# Supplementary material
Source: MDPI journal article supplement (https://www.mdpi.com/2813-2084/2/4/21)
Supplement: s1 [file s1]

| Citation                               | Assessment of relevancy | Assessment of reliability | Assessment of Validity | Assessment of applicability                                                               |
|----------------------------------------|-------------------------|---------------------------|------------------------|-------------------------------------------------------------------------------------------|
| Althumairi et al. (2021)               | YES                     | YES                       | YES                    | YES                                                                                       |
| Chang et al. (2022)                    | YES                     | YES                       | YES                    | YES                                                                                       |
| (Ellerton et al., 2020)                | YES                     | YES                       | YES                    | N/A Study is a protocol for a feasibility study, the actual study has yet to be published |
| (Gibson et al., 2022)                  | YES                     | YES                       | YES                    | YES                                                                                       |
| (Herrera et al., 2022)                 | YES                     | YES                       | YES                    | N/A Study is a protocol for a feasibility study, the actual study has yet to be published |
| (Lim et al., 2021)                     | YES                     | YES                       | YES                    | N/A Study is a protocol for a feasibility study, the actual study has yet to be published |
| (Lundin et al., 2022)                  | YES                     | YES                       | YES                    | YES                                                                                       |
| (Navarro-Haro et al., 2019)            | YES                     | YES                       | YES                    | YES                                                                                       |
| (Palomo & Rodrigues de Oliveira, 2018) | YES                     | YES                       | YES                    | N/A Study is a protocol for a feasibility study, the actual study has yet to be published |
| (Tan et al., 2022)                     | YES                     | YES                       | YES                    | YES                                                                                       |
| (Wong et al., 2021)                    | YES                     | YES                       | YES                    | YES                                                                                       |
