# Supplementary material
Source: MDPI journal article supplement (https://www.mdpi.com/2813-2084/2/4/21)
Supplement: s1 [file s1]

Supplementary file S1  
Systematic Review Search Results June 2022

## PHC and XR Systematic Review Search Results June 2022

Ovid MEDLINE ALL (including MeSH headings) [1946 to Present]

Date searched: 21/06/2022

|   | Search terms                                                                                                                                                                                                                                                                                                                                                                                                                                                                                                                                                                                                                                                       | Number of results |
|---|--------------------------------------------------------------------------------------------------------------------------------------------------------------------------------------------------------------------------------------------------------------------------------------------------------------------------------------------------------------------------------------------------------------------------------------------------------------------------------------------------------------------------------------------------------------------------------------------------------------------------------------------------------------------|-------------------|
| 1 | (primary health* or primary care or PHC or primary medical care or general practi* or GP or family physician* or family practice* or family medicine or family care or family health or family doctor or medical specialist or specialist physician or office visit* or ambulatory care or primary medical care or medical clinic* or medical office* or community care or community medicine or community health or community mental health or home care or home based or home health or health visit* or preventative care or preventative service* or preventative program* or preventative health or health promotion or ongoing care or standard care).ti,ab. | 379906            |
| 2 | exp Primary Health Care/ or exp Community Health Centers/ or exp Office Visits/ or exp Physicians, Family/ or exp Family Practice/ or exp Ambulatory Care/ or exp General Practitioners/ OR exp Community Mental Health Services/ OR exp Community Health Services/                                                                                                                                                                                                                                                                                                                                                                                                | 618633            |
| 3 | 1 or 2                                                                                                                                                                                                                                                                                                                                                                                                                                                                                                                                                                                                                                                             | 141086            |
| 4 | (virtual reality or mixed reality or augmented reality or extended reality or head-mounted display* or virtual environment* or immersive technolog* or immersive system*).ti,ab.                                                                                                                                                                                                                                                                                                                                                                                                                                                                                   | 14471             |
| 5 | exp Augmented Reality/ or exp Virtual Reality/                                                                                                                                                                                                                                                                                                                                                                                                                                                                                                                                                                                                                     | 5208              |
| 6 | 4 or 5                                                                                                                                                                                                                                                                                                                                                                                                                                                                                                                                                                                                                                                             | 15266             |
| 7 | 3 and 6                                                                                                                                                                                                                                                                                                                                                                                                                                                                                                                                                                                                                                                            | 320               |

Limit to English language and journal article: 304

Supplementary file S1  
Systematic Review Search Results June 2022

APA PsycINFO [1806 to Present] (Ovid)

Date searched: 21/06/2022

|   | Search terms                                                                                                                                                                                                                                                                                                                                                                                                                                                                                                                                                                                                                                                       | Number of results |
|---|--------------------------------------------------------------------------------------------------------------------------------------------------------------------------------------------------------------------------------------------------------------------------------------------------------------------------------------------------------------------------------------------------------------------------------------------------------------------------------------------------------------------------------------------------------------------------------------------------------------------------------------------------------------------|-------------------|
| 1 | (primary health* or primary care or PHC or primary medical care or general practi* or GP or family physician* or family practice* or family medicine or family care or family health or family doctor or medical specialist or specialist physician or office visit* or ambulatory care or primary medical care or medical clinic* or medical office* or community care or community medicine or community health or community mental health or home care or home based or home health or health visit* or preventative care or preventative service* or preventative program* or preventative health or health promotion or ongoing care or standard care).ti,ab. | 106065            |
| 2 | exp Primary Health Care/ or exp Ambulatory Care/ or Family Medicine/or Family Physicians/ or General Practitioners/ or exp Community Health/ or exp Community Mental Health Services/                                                                                                                                                                                                                                                                                                                                                                                                                                                                              | 48614             |
| 3 | 1 or 2                                                                                                                                                                                                                                                                                                                                                                                                                                                                                                                                                                                                                                                             | 123578            |
| 4 | (virtual reality or mixed reality or augmented reality or extended reality or head-mounted display* or virtual environment* or immersive technolog* or immersive system*).ti,ab.                                                                                                                                                                                                                                                                                                                                                                                                                                                                                   | 11125             |
| 5 | exp Augmented Reality/ or exp Virtual Reality/                                                                                                                                                                                                                                                                                                                                                                                                                                                                                                                                                                                                                     | 10558             |
| 6 | 4 or 5                                                                                                                                                                                                                                                                                                                                                                                                                                                                                                                                                                                                                                                             | 14338             |
| 7 | 3 and 6                                                                                                                                                                                                                                                                                                                                                                                                                                                                                                                                                                                                                                                            | 140               |

Limited by English language and peer review journal: 109

Supplementary file S1

Systematic Review Search Results June 2022

Ovid Emcare

Date searched: 21/06/2022

|   | Search terms                                                                                                                                                                                                                                                                                                                                                                                                                                                                                                                                                                                                                                                       | Number of results |
|---|--------------------------------------------------------------------------------------------------------------------------------------------------------------------------------------------------------------------------------------------------------------------------------------------------------------------------------------------------------------------------------------------------------------------------------------------------------------------------------------------------------------------------------------------------------------------------------------------------------------------------------------------------------------------|-------------------|
| 1 | (primary health* or primary care or PHC or primary medical care or general practi* or GP or family physician* or family practice* or family medicine or family care or family health or family doctor or medical specialist or specialist physician or office visit* or ambulatory care or primary medical care or medical clinic* or medical office* or community care or community medicine or community health or community mental health or home care or home based or home health or health visit* or preventative care or preventative service* or preventative program* or preventative health or health promotion or ongoing care or standard care).ti,ab. | 232070            |
| 2 | exp Primary Health Care/ or exp Ambulatory Care/ or exp Family Medicine/ or exp General Practitioners/ or exp Health Center/ or exp Community Mental Health Services/ or exp Community Care/                                                                                                                                                                                                                                                                                                                                                                                                                                                                       | 214034            |
| 3 | 1 or 2                                                                                                                                                                                                                                                                                                                                                                                                                                                                                                                                                                                                                                                             | 322651            |
| 4 | (virtual reality or mixed reality or augmented reality or extended reality or head-mounted display* or virtual environment* or immersive technolog* or immersive system*).ti,ab.                                                                                                                                                                                                                                                                                                                                                                                                                                                                                   | 10965             |
| 5 | exp Augmented Reality/ or exp Virtual Reality/                                                                                                                                                                                                                                                                                                                                                                                                                                                                                                                                                                                                                     | 11083             |
| 6 | 4 or 5                                                                                                                                                                                                                                                                                                                                                                                                                                                                                                                                                                                                                                                             | 14554             |
| 7 | 3 and 6                                                                                                                                                                                                                                                                                                                                                                                                                                                                                                                                                                                                                                                            | 337               |

Limited by English language, journal, and article: 220

# Supplementary file S1

## Systematic Review Search Results June 2022

Cochrane Library via All EBM Reviews – Cochrane DSR, ACP Journal Club, DARE, CCA, CCTR, CMR, HTA, and NHSEED (Ovid)

Date searched: 21/06/2022

|   | Search terms                                                                                                                                                                                                                                                                                                                                                                                                                                                                                                                                                                                                                                                       | Number of results |
|---|--------------------------------------------------------------------------------------------------------------------------------------------------------------------------------------------------------------------------------------------------------------------------------------------------------------------------------------------------------------------------------------------------------------------------------------------------------------------------------------------------------------------------------------------------------------------------------------------------------------------------------------------------------------------|-------------------|
| 1 | (primary health* or primary care or PHC or primary medical care or general practi* or GP or family physician* or family practice* or family medicine or family care or family health or family doctor or medical specialist or specialist physician or office visit* or ambulatory care or primary medical care or medical clinic* or medical office* or community care or community medicine or community health or community mental health or home care or home based or home health or health visit* or preventative care or preventative service* or preventative program* or preventative health or health promotion or ongoing care or standard care).ti,ab. | 70629             |
| 2 | (virtual reality or mixed reality or augmented reality or extended reality or head-mounted display* or virtual environment* or immersive technolog* or immersive system*).ti,ab.                                                                                                                                                                                                                                                                                                                                                                                                                                                                                   | 4990              |
| 2 | 1 and 2                                                                                                                                                                                                                                                                                                                                                                                                                                                                                                                                                                                                                                                            | 229               |

Limited by English Language and Journal Article: 80

CINAHL Plus with Full-Text

Date searched: 21/06/2022

|    | Search terms                                                                                                                                                                                                                                                                                                                                                                                                                                                | Number of results |
|----|-------------------------------------------------------------------------------------------------------------------------------------------------------------------------------------------------------------------------------------------------------------------------------------------------------------------------------------------------------------------------------------------------------------------------------------------------------------|-------------------|
| S1 | (MH "Community Health Centers+") OR (MH "Primary Health Care") OR (MH "Office Visits") OR (MH "Physicians, Family") OR (MH "Family Practice") OR (MH "Ambulatory Care") OR (MH "Community Health Services"+) OR (MH "Community Mental Health Services"+)                                                                                                                                                                                                    | 132403            |
| S2 | TI("primary health*" OR "primary care" OR PHC OR "primary medical care" OR "general practi*" OR GP OR "family physician*" OR "family practice*" OR "family medicine" OR "family care" OR "family health" OR "family doctor*" OR "medical specialist" OR "specialist physician" OR "office visit" OR "ambulatory care" OR "primary medical care" OR "medical clinic*" OR "medical office*" OR "community care" OR "community medicine" OR "community health" | 102698            |

Supplementary file S1

Systematic Review Search Results June 2022

|    |                                                                                                                                                                                                                                                                                                                                                                                                                                                                                                                                                                                                                                                                                                                                 |        |
|----|---------------------------------------------------------------------------------------------------------------------------------------------------------------------------------------------------------------------------------------------------------------------------------------------------------------------------------------------------------------------------------------------------------------------------------------------------------------------------------------------------------------------------------------------------------------------------------------------------------------------------------------------------------------------------------------------------------------------------------|--------|
|    | OR "community medical health" OR "home care" OR "home based" OR "home health" OR "health visit*" OR "preventative care" OR "preventative service*" OR "preventative program*" OR "Preventative health" OR "health promotion" OR "ongoing care" OR "standard care")                                                                                                                                                                                                                                                                                                                                                                                                                                                              |        |
| S3 | AB("primary health*" OR "primary care" OR PHC OR "primary medical care" OR "general practi*" OR GP OR "family physician*" OR "family practice*" OR "family medicine" OR "family care" OR "family health" OR "family doctor*" OR "medical specialist" OR "specialist physician" OR "office visit" OR "ambulatory care" OR "primary medical care" OR "medical clinic*" OR "medical office*" OR "community care" OR "community medicine" OR "community health*" OR "community medical health" OR "home care" OR "home based" OR "home health" OR "health visit*" OR "preventative care" OR "preventative service*" OR "preventative program*" OR "Preventative health" OR "health promotion" OR "ongoing care" OR "standard care") | 181031 |
| S4 | S1 OR S2 OR S3                                                                                                                                                                                                                                                                                                                                                                                                                                                                                                                                                                                                                                                                                                                  | 286915 |
| S5 | (MH "Virtual Reality+") OR (MH "Augmented Reality")                                                                                                                                                                                                                                                                                                                                                                                                                                                                                                                                                                                                                                                                             | 6963   |
| S6 | TI("virtual reality" OR "mixed reality" OR "augmented reality" OR "extended reality" OR "head-mounted display*" OR "virtual environment*" OR "immersive technolog*" OR "immersive system*")                                                                                                                                                                                                                                                                                                                                                                                                                                                                                                                                     | 4547   |
| S7 | AB("virtual reality" OR "mixed reality" OR "augmented reality" OR "extended reality" OR "head-mounted display*" OR "virtual environment*" OR "immersive technolog*" OR "immersive system*")                                                                                                                                                                                                                                                                                                                                                                                                                                                                                                                                     | 5405   |
| S8 | S5 OR S6 OR S7                                                                                                                                                                                                                                                                                                                                                                                                                                                                                                                                                                                                                                                                                                                  | 11060  |
| S9 | S4 AND S8                                                                                                                                                                                                                                                                                                                                                                                                                                                                                                                                                                                                                                                                                                                       | 292    |

Limited by English language and Academic Journals: 239

# Supplementary file S1

## Systematic Review Search Results June 2022

Scopus

Date searched: 21/06/2022

|  | Search terms                                                                                                                                                                                                                                                                                                                                                                                                                                                                                                                                                                                                                                                                                                                                                                                                                                                                                                                                                                 | Number of results |
|--|------------------------------------------------------------------------------------------------------------------------------------------------------------------------------------------------------------------------------------------------------------------------------------------------------------------------------------------------------------------------------------------------------------------------------------------------------------------------------------------------------------------------------------------------------------------------------------------------------------------------------------------------------------------------------------------------------------------------------------------------------------------------------------------------------------------------------------------------------------------------------------------------------------------------------------------------------------------------------|-------------------|
|  | <p>( TITLE-ABS ( "primary health*" OR "primary care" OR phc OR "primary medical care" OR "general practi*" OR gp OR "family physician*" OR "family practice*" OR "family medicine" OR "family care" OR "family health" OR "family doctor*" OR "medical specialist" OR "specialist physician" OR "office visit" OR "ambulatory care" OR "primary medical care" OR "medical clinic*" OR "medical office*" OR "community care" OR "community medicine" OR "community health*" OR "community medical health" OR "home care" OR "home based" OR "home health" OR "health visit*" OR "preventative care" OR "preventative service*" OR "preventative program*" OR "Preventative health" OR "health promotion" OR "ongoing care" OR "standard care" )</p> <p>AND</p> <p>TITLE-ABS ( "virtual reality" OR "mixed reality" OR "augmented reality" OR "extended reality" OR "head-mounted display*" OR "virtual environment*" OR "immersive technolog*" OR "immersive system*" ) )</p> | 539               |

Limited by English Language and Article: 265

Web of Science

Date searched: 21/06/2022

|  | Search terms                                                                                                                                                                                                                                                                                                                                                                                                                                                                                                                                                                                                                                                                                                                                 | Number of results |
|--|----------------------------------------------------------------------------------------------------------------------------------------------------------------------------------------------------------------------------------------------------------------------------------------------------------------------------------------------------------------------------------------------------------------------------------------------------------------------------------------------------------------------------------------------------------------------------------------------------------------------------------------------------------------------------------------------------------------------------------------------|-------------------|
|  | <p>("primary health*" OR "primary care" OR PHC OR "primary medical care" OR "general practi*" OR GP OR "family physician*" OR "family practice*" OR "family medicine" OR "family care" OR "family health" OR "family doctor*" OR "medical specialist" OR "specialist physician" OR "office visit" OR "ambulatory care" OR "primary medical care" OR "medical clinic*" OR "medical office*" OR "community care" OR "community medicine" OR "community health*" OR "community medical health" OR "home care" OR "home based" OR "home health" OR "health visit*" OR "preventative care" OR "preventative service*" OR "preventative program*" OR "Preventative health" OR "health promotion" OR "ongoing care" OR "standard care") (Topic)</p> | 564               |

Supplementary file S1  
Systematic Review Search Results June 2022

|  |                                                                                                                                                                                                          |  |
|--|----------------------------------------------------------------------------------------------------------------------------------------------------------------------------------------------------------|--|
|  | AND<br>("virtual reality" OR "mixed reality" OR "augmented reality" OR "extended reality" OR “head-mounted display*” OR "virtual environment*" OR "immersive technolog*" OR “immersive system*”) (Topic) |  |
|--|----------------------------------------------------------------------------------------------------------------------------------------------------------------------------------------------------------|--|

Limited by English Language and Articles: 346

Supplementary file S1

Systematic Review Search Results June 2022

ProQuest Computer Science Database

Date searched: 21/06/2022

|    | Search terms                                                                                                                                                                                                                                                                                                                                                                                                                                                                                                                                                                                                                                                                                                                    | Number of results |
|----|---------------------------------------------------------------------------------------------------------------------------------------------------------------------------------------------------------------------------------------------------------------------------------------------------------------------------------------------------------------------------------------------------------------------------------------------------------------------------------------------------------------------------------------------------------------------------------------------------------------------------------------------------------------------------------------------------------------------------------|-------------------|
| S1 | MAINSUBJECT.EXACT("Primary care") OR MAINSUBJECT.EXACT("Family physicians") OR MAINSUBJECT.EXACT("Community health care") OR MAINSUBJECT.EXACT("Ambulatory care")                                                                                                                                                                                                                                                                                                                                                                                                                                                                                                                                                               | 4896              |
| S2 | ti("primary health*" OR "primary care" OR PHC OR "primary medical care" OR "general practi*" OR GP OR "family physician*" OR "family practice*" OR "family medicine" OR "family care" OR "family health" OR "family doctor*" OR "medical specialist" OR "specialist physician" OR "office visit" OR "ambulatory care" OR "primary medical care" OR "medical clinic*" OR "medical office*" OR "community care" OR "community medicine" OR "community health*" OR "community medical health" OR "home care" OR "home based" OR "home health" OR "health visit*" OR "preventative care" OR "preventative service*" OR "preventative program*" OR "Preventative health" OR "health promotion" OR "ongoing care" OR "standard care") | 4247              |
| S3 | ab("primary health*" OR "primary care" OR PHC OR "primary medical care" OR "general practi*" OR GP OR "family physician*" OR "family practice*" OR "family medicine" OR "family care" OR "family health" OR "family doctor*" OR "medical specialist" OR "specialist physician" OR "office visit" OR "ambulatory care" OR "primary medical care" OR "medical clinic*" OR "medical office*" OR "community care" OR "community medicine" OR "community health*" OR "community medical health" OR "home care" OR "home based" OR "home health" OR "health visit*" OR "preventative care" OR "preventative service*" OR "preventative program*" OR "Preventative health" OR "health promotion" OR "ongoing care" OR "standard care") | 11751             |
| S4 | S1 OR S2 OR S3                                                                                                                                                                                                                                                                                                                                                                                                                                                                                                                                                                                                                                                                                                                  | 17414             |
| S5 | MAINSUBJECT.EXACT("Virtual reality") OR MAINSUBJECT.EXACT("Augmented reality")                                                                                                                                                                                                                                                                                                                                                                                                                                                                                                                                                                                                                                                  | 29627             |
| S6 | ti("virtual reality" OR "mixed reality" OR "augmented reality" OR "extended reality" OR "head-mounted display*" OR "virtual environment*" OR "immersive technolog*" OR "immersive system*")                                                                                                                                                                                                                                                                                                                                                                                                                                                                                                                                     | 24287             |
| S7 | ab("virtual reality" OR "mixed reality" OR "augmented reality" OR "extended reality" OR "head-mounted display*" OR "virtual environment*" OR "immersive technolog*" OR "immersive system*")                                                                                                                                                                                                                                                                                                                                                                                                                                                                                                                                     | 14991             |

Supplementary file S1

Systematic Review Search Results June 2022

|    |                |       |
|----|----------------|-------|
| S8 | S5 OR S6 OR S7 | 43351 |
| S9 | S4 AND S8      | 30    |

Limited by English and Scholarly Journal: 16

IEEE Xplore

Date searched: 21/06/2022

|   | Search terms                                                                                                                                                                                                                                                                                                                                                                                                                                                                                                                                                                                                                                                                               | Number of results |
|---|--------------------------------------------------------------------------------------------------------------------------------------------------------------------------------------------------------------------------------------------------------------------------------------------------------------------------------------------------------------------------------------------------------------------------------------------------------------------------------------------------------------------------------------------------------------------------------------------------------------------------------------------------------------------------------------------|-------------------|
| 1 | <p>All Metadata:</p> <p>"primary health*" OR "primary care" OR PHC OR "primary medical care" OR "general practi*" OR GP OR "family physician" OR "family practice" OR "family medicine" OR "family care" OR "family health" OR "family doctor" OR "medical specialist" OR "specialist physician" OR "office visit" OR "ambulatory care" OR "primary medical care" OR "medical clinic" OR "medical office" OR "community care" OR "community medicine" OR "community health*" OR "community medical health" OR "home care" OR "home health" OR "health visit" OR "preventative care" OR "preventative service" OR "preventative program" OR "Preventative health" OR "health promotion"</p> | 8473              |
| 2 | <p>All Metadata:</p> <p>"virtual reality" OR "mixed reality" OR "augmented reality" OR "extended reality" OR "head-mounted display*" OR "virtual environment*" OR "immersive technolog*" OR "immersive system"</p>                                                                                                                                                                                                                                                                                                                                                                                                                                                                         | 50031             |
| 3 | 1 and 2                                                                                                                                                                                                                                                                                                                                                                                                                                                                                                                                                                                                                                                                                    | 82                |

Limited by Journals: 14

Supplementary file S1

Systematic Review Search Results June 2022

Computers and Applied Sciences Complete (EBSCOhost)

Date searched: 21/06/2022

|    | Search terms                                                                                                                                                                                                                                                                                                                                                                                                                                                                                                                                                                                                                                                                                                                    | Number of results |
|----|---------------------------------------------------------------------------------------------------------------------------------------------------------------------------------------------------------------------------------------------------------------------------------------------------------------------------------------------------------------------------------------------------------------------------------------------------------------------------------------------------------------------------------------------------------------------------------------------------------------------------------------------------------------------------------------------------------------------------------|-------------------|
| S1 | TI("primary health*" OR "primary care" OR PHC OR "primary medical care" OR "general practi*" OR GP OR "family physician*" OR "family practice*" OR "family medicine" OR "family care" OR "family health" OR "family doctor*" OR "medical specialist" OR "specialist physician" OR "office visit" OR "ambulatory care" OR "primary medical care" OR "medical clinic*" OR "medical office*" OR "community care" OR "community medicine" OR "community health*" OR "community medical health" OR "home care" OR "home based" OR "home health" OR "health visit*" OR "preventative care" OR "preventative service*" OR "preventative program*" OR "Preventative health" OR "health promotion" OR "ongoing care" OR "standard care") | 1310              |
| S2 | AB("primary health*" OR "primary care" OR PHC OR "primary medical care" OR "general practi*" OR GP OR "family physician*" OR "family practice*" OR "family medicine" OR "family care" OR "family health" OR "family doctor*" OR "medical specialist" OR "specialist physician" OR "office visit" OR "ambulatory care" OR "primary medical care" OR "medical clinic*" OR "medical office*" OR "community care" OR "community medicine" OR "community health*" OR "community medical health" OR "home care" OR "home based" OR "home health" OR "health visit*" OR "preventative care" OR "preventative service*" OR "preventative program*" OR "Preventative health" OR "health promotion" OR "ongoing care" OR "standard care") | 8305              |
| S3 | S1 OR S2                                                                                                                                                                                                                                                                                                                                                                                                                                                                                                                                                                                                                                                                                                                        | 8604              |
| S4 | TI("virtual reality" OR "mixed reality" OR "augmented reality" OR "extended reality" OR "head-mounted display*" OR "virtual environment*" OR "immersive technolog*" OR "immersive system*")                                                                                                                                                                                                                                                                                                                                                                                                                                                                                                                                     | 5890              |
| S5 | AB("virtual reality" OR "mixed reality" OR "augmented reality" OR "extended reality" OR "head-mounted display*" OR "virtual environment*" OR "immersive technolog*" OR "immersive system*")                                                                                                                                                                                                                                                                                                                                                                                                                                                                                                                                     | 14212             |
| S6 | S4 OR S5                                                                                                                                                                                                                                                                                                                                                                                                                                                                                                                                                                                                                                                                                                                        | 15055             |
| S7 | S3 AND S6                                                                                                                                                                                                                                                                                                                                                                                                                                                                                                                                                                                                                                                                                                                       | 30                |

Supplementary file S1

Systematic Review Search Results June 2022

Limited by Scholarly (Peer Reviewed Journals): 27

Total All Databases

Total articles from 10 databases: **1620**

Total articles including databases and handsearching: **1639** (19 articles from handsearching Primo Search and Google Scholar)

Total articles after duplicates removed: **856** (783 duplicates removed)

Total articles after excluded older articles (limited date to the last 10 years): **710** (146 articles older than 2012 removed)
