# Supplementary material
Source: MDPI journal article supplement (https://www.mdpi.com/2813-2084/2/4/21)
Supplement: s1 [file s1]

Archive with 2 entries (2 files):
- Supplementary file S1.pdf
- Supplementary file S2.pdf
